# Supplementary material for: Highly selective fluorescence sensors for the fluoride anion based on carboxylate-bridged diiron complexes
Source: Royal Society of Chemistry journal article supplement (doi:10.1039/c5dt03801d), 2015-11-18
Supplement: c5dt03801d1.pdf [file c5dt03801d1.pdf]

## Supporting information for

### Highly selective fluorescence sensors for the fluoride anion based on carboxylate-bridged dinuclear iron complexes

Yuhan Zhou\*, Xiaoliang Dong, Yixin Zhang, Peng Tong, and Jingping Qu\*

*State Key Laboratory of Fine Chemicals, School of Pharmaceutical Science and Technology, Dalian  
University of Technology, Dalian, 116024, P.R. China*

#### Contents

|                                                                                                    |    |
|----------------------------------------------------------------------------------------------------|----|
| Synthesis of complex <b>4c</b> .....                                                               | S2 |
| <b>Fig. S1</b> Absorption spectrum of <b>5b</b> upon addition of various anions.....               | S2 |
| <b>Fig. S2</b> Absorption spectrum of <b>5a</b> .....                                              | S2 |
| <b>Fig. S3</b> Absorption spectrum of <b>5c</b> .....                                              | S3 |
| <b>Fig. S4</b> Job's plot of <b>5b</b> .....                                                       | S3 |
| <b>Fig. S5</b> Fluorescence spectrum of <b>5b</b> upon addition of coexisting relevant anions..... | S4 |
| <b>Fig. S6</b> Fluorescence spectrum of <b>5c</b> upon addition of different anions.....           | S4 |
| <b>Fig. S7</b> Partial <sup>1</sup> H NMR spectrum of <b>5b</b> .....                              | S5 |
| <b>Fig. S8</b> ESI-HRMS of <b>5b</b> upon addition of F <sup>-</sup> .....                         | S5 |
| References.....                                                                                    | S5 |

### Synthesis of $[\text{Cp}^*\text{Ru}(\mu\text{-SEt})_2(\text{MeCN})_2\text{RuCp}^*][\text{PF}_6]_2$ (**4c**)

To a solution of  $[\text{Cp}^*\text{Ru}(\mu\text{-SEt})_2\text{Cl}_2\text{RuCp}^*]^1$  (69.4 mg, 0.104 mmol) in MeCN (3 mL) was added  $\text{NH}_4\text{PF}_6$  (67.9 mg, 0.416 mmol) and then the resulting solution was stirred at room temperature under Ar for 1 h. The solution was removed *in vacuum*. Then, the residue was extracted with  $\text{CH}_2\text{Cl}_2$  (3 mL). After filtration, the solution was removed *in vacuum*. The residue was washed with  $\text{Et}_2\text{O}$  (2 mL  $\times$  2) to give brown solid  $[\text{Cp}^*\text{Ru}(\mu\text{-SEt})_2(\text{MeCN})_2\text{RuCp}^*][\text{PF}_6]_2$  (**4c**, 80.6 mg, 80%).  $^1\text{H}$  NMR (400 MHz,  $\text{CD}_2\text{Cl}_2$ ):  $\delta$  2.92 (q,  $J_{\text{H-H}} = 8.0$  Hz, 4H), 2.27 (s, 6H), 1.72 (s, 30H), 1.61 (t,  $J_{\text{H-H}} = 8.0$  Hz, 6H).

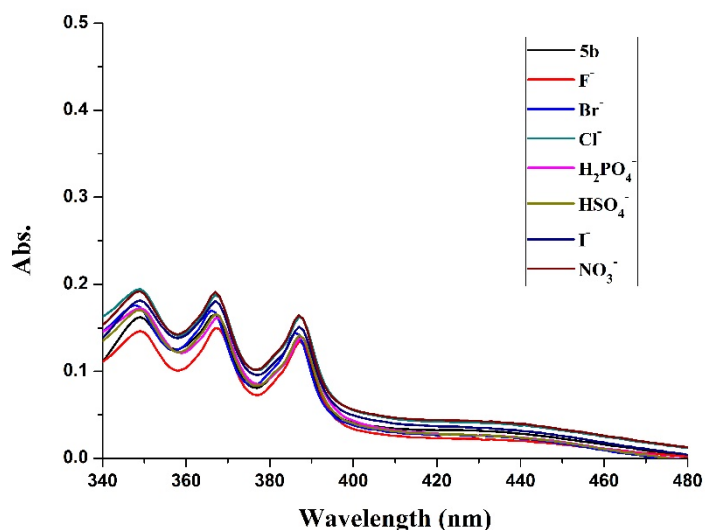

**Fig. S1** Absorption spectra of chemosensor **5b** ( $1 \times 10^{-5}$  M) upon addition of various anions (3 equiv) in THF solution.

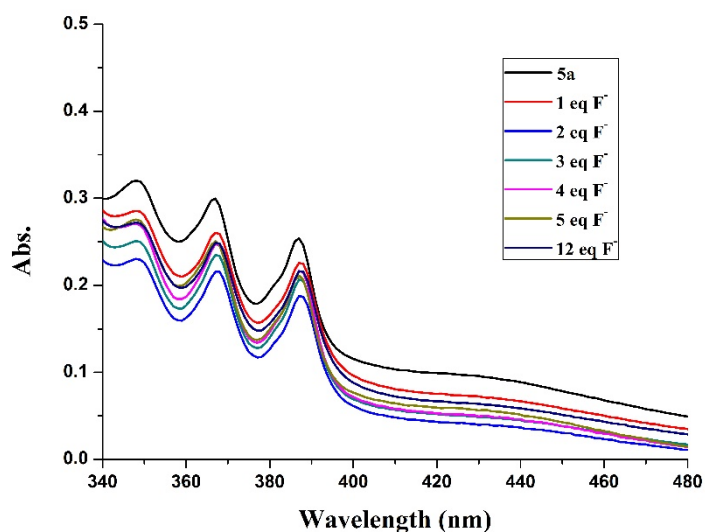

**Fig. S2** Absorption spectra of chemosensor **5a** ( $1 \times 10^{-5}$  M) upon addition of F<sup>-</sup> (as its TBA salts) in THF.

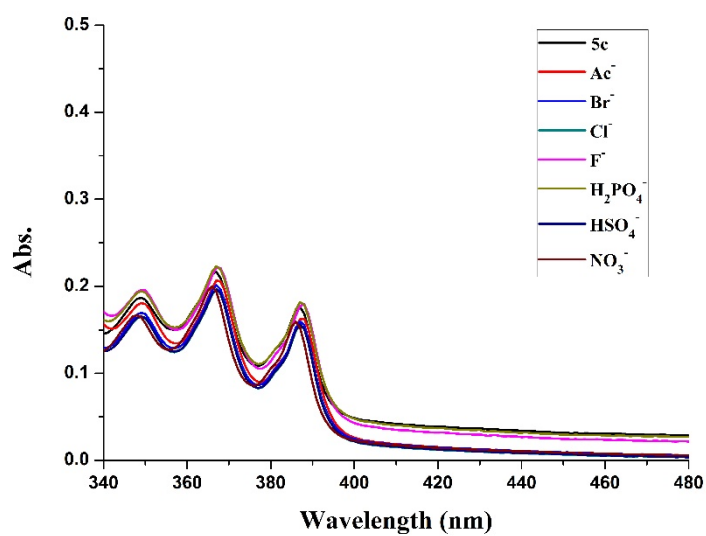

**Fig. S3** Absorption spectra of chemosensor **5c** ( $1 \times 10^{-5}$  M) upon addition of various anions (as their TBA salts) in THF.

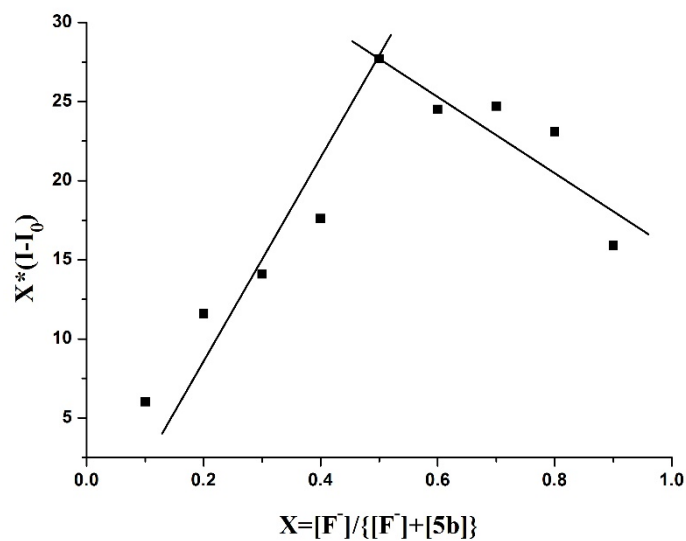

**Fig. S4** Job's plot for determining the stoichiometry for chemosensor **5b** and  $F^-$  in THF excited with 370 nm. Total concentration of **5b** +  $Fe^{3+}$  =  $2.5 \times 10^{-5}$  M.  $I$  represents the intensity of **5b** upon addition of  $F^-$  and  $I_0$  represents the **5b** original emission intensity at 414 nm excited with 370 nm.

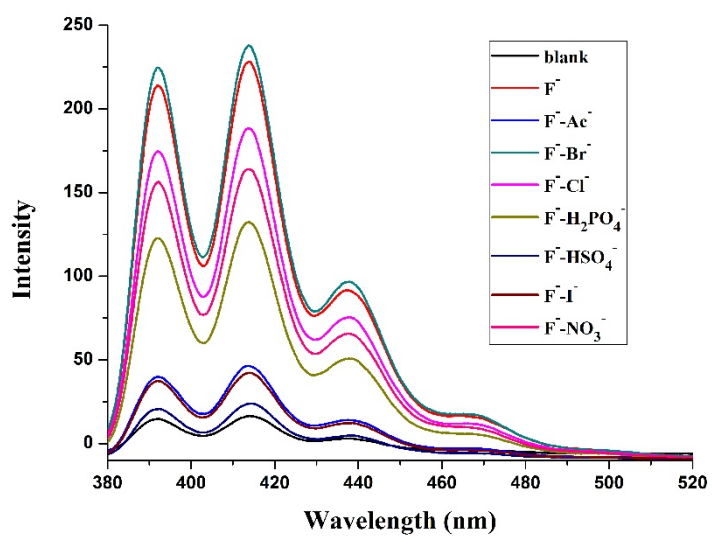

**Fig. S5** Fluorescence emission spectra of chemosensor **5b** ( $1 \times 10^{-5}$  M in THF) upon addition of anions in the presence of F<sup>-</sup>

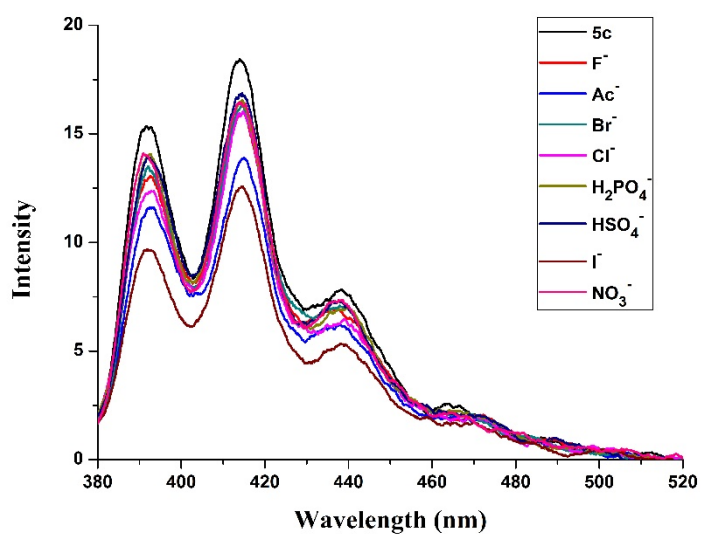

**Fig. S6** Fluorescence spectrum of **5c** ( $1 \times 10^{-5}$  M in THF) upon addition of different anions (as their TBA salts) excited with 370 nm.

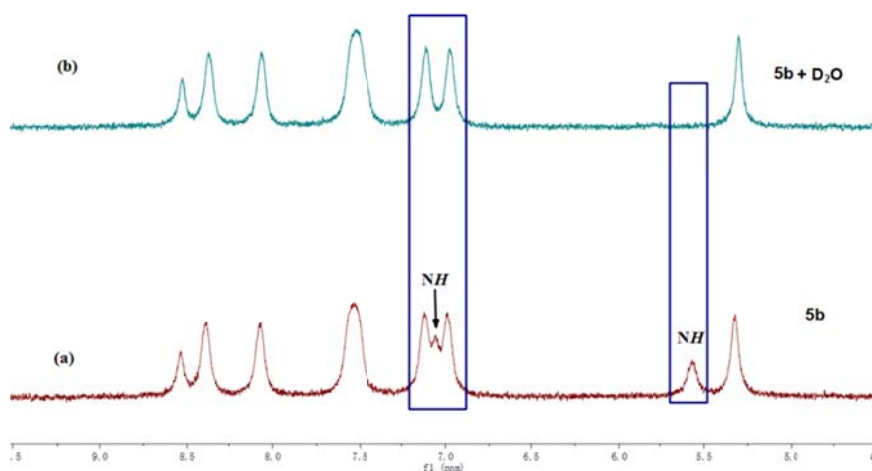

**Fig. S7** Partial  $^1\text{H}$  NMR ( $\text{CD}_3\text{CN}$ , 400 MHz) spectrum of **5b** before (a) and after (b) adding  $\text{D}_2\text{O}$ .

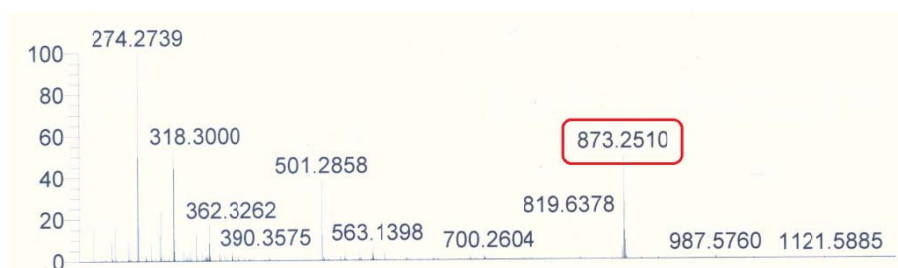

**Fig. S8** The ESI-HRMS of chemosensor **5b** upon addition of 2 equiv of  $\text{F}^-$ .

## References

- [1] Y. Nishibayashi, H. Imajima, G. Onodera, Y. Inada, M. Hidai and S. Uemura, *Organometallics* 2004, **23**, 5100-5103.
